# Supplementary material for: Development of digital competences in the Bulgarian secondary school context–a literature review of good practices
Source: Frontiers journal article supplement (doi:10.3389/feduc.2024.1434797), 2024-12-05
Supplement: Data_Sheet_1.xlsx [file Data_Sheet_1.xlsx]

## Sheet: Primary data
					Clusters						Findings					Sources' databases
#	URL	Title	Authors	Year	Mathematics	CMIT	IT	Informatics - specialized & vocational training	ИТ ПП	CPD programmes for educators	Students DigComp development	Teachers DigCompEdu development	Анализ на документи	Teaching & learning approaches	Other innovations	Ref WoS	Ref Scopus	IATED	Other DB	Reasons dor exclusion	Findings summary
1	http://www.math.bas.bg/smb/2019_PK/tom_2019/pdf/150-156.pdf	ОБРАЗОВАТЕЛНИ КОМПЮТЪРНИ ИГРОВИ СРЕДИ ЗА ОБУЧЕНИЕ ПО ПРОГРАМИРАНЕ И РАЗВИТИЕ НА АЛГОРИТМИЧНO МИСЛЕНЕ – СРАВНИТЕЛЕН АНАЛИЗ	Georgieva, R; Tuparova, D	2019	FALSE	TRUE	FALSE	TRUE	FALSE	TRUE	FALSE	FALSE	TRUE	FALSE	FALSE	FALSE	FALSE	FALSE	TRUE		- Game-based learning - learning by programming - environment for game development through programming by students - IDE in game-based situations conclusions: - Motivated environment - entertainment in education - educational goals driven - relevant to educational standards - immediate feedback DigComp: - 2.1. Interacting through digital technologies - 3.4. Programming
2	http://www.math.bas.bg/smb/2020_PK/tom_2020/pdf/198-206.pdf	ГЕОДЕЗИЧНИ ЗАДАЧИ В ОБУЧЕНИЕТО ПО	Zablotskii, V.; Vasileva, S.	2020	TRUE	FALSE	FALSE	TRUE	FALSE	FALSE	TRUE	FALSE	FALSE	FALSE	FALSE	FALSE	FALSE	FALSE	TRUE		Methods: Learning by programming Problem-based learning Results Improvment of self-regulated learning Dig. Comp: 1. Information and Data Literacy 2. Communication and Collaboration 3. Digital Content Creation 3.4. Programming 5.2. Identifying needs and thech responces
3	https://www.webofscience.com/wos/woscc/full-record/WOS:000664205600059	Challenges to the Development of Teachers' Professional Digital Competences - Bulgarian Perspective	Mizova, B; Peytcheva-Forsyth, R and Gospodinov, B	2021	FALSE	FALSE	FALSE	FALSE	FALSE	TRUE	FALSE	TRUE	TRUE	TRUE	FALSE	TRUE	TRUE	FALSE	FALSE
4	https://www.webofscience.com/wos/woscc/full-record/WOS:000798064100006	STUDENTS' ACTIVITIES IN THE DIGITAL ENVIRONMENT	Shopova, T	2022	FALSE	FALSE	TRUE	FALSE	FALSE	FALSE	TRUE	TRUE	TRUE	TRUE	FALSE	TRUE	FALSE	FALSE	FALSE
5	https://www.webofscience.com/wos/woscc/full-record/WOS:000798496900001	COMPUTER MODELS FOR PLAYING BILLIARDS USING FRONTAL SHOT	Chehlarova, T	2022	TRUE	FALSE	TRUE	FALSE	FALSE	FALSE	TRUE	TRUE	FALSE	TRUE	FALSE	TRUE	FALSE	FALSE	FALSE		Methods used: Computer simulations and modelling Game-based learning Problem-based learning (PBL) 1.2. Evaluating data, information and digital content 1.3. Managing data, information and digital content 3.2. Integrating and re-elaborating digital content 5.3. Creatively using digital technologies
6	http://www.math.bas.bg/smb/2023_PK/tom_2023/pdf/192-197.pdf	КАК СЕ ОТРАЗИ ОБУЧЕНИЕТО ОТ РАЗСТОЯНИЕ В ЕЛЕКТРОННА СРЕДА НА ДЕЦАТА БИЛИНГВИ В ОБУЧЕНИЕТО ПО МАТЕМАТИКА, ИНФОРМАТИКА И ИНФОРМАЦИОННИ ТЕХНОЛОГИИ	Stefanova-Milanova, S.	2023	TRUE	FALSE	TRUE	FALSE	FALSE	FALSE	FALSE	FALSE	FALSE	FALSE	FALSE	FALSE	FALSE	FALSE	TRUE	No described practices	Digital Safety Problem Solving Communication and Collaboration
7	http://www.math.bas.bg/smb/2020_PK/tom_2020/pdf/239-245.pdf	МОДЕЛИ НА ЗЛАТНИ ПРАВОЪГЪЛНИЦИ	Chehlarova, T.	2020	TRUE	FALSE	FALSE	FALSE	FALSE	TRUE	FALSE	FALSE	FALSE	FALSE	FALSE	FALSE	FALSE	FALSE	TRUE		Digital Content Creation Information and Data Literacy Digital Safety
8	http://www.math.bas.bg/smb/2020_PK/tom_2020/pdf/220-228.pdf	ИЗПОЛЗВАНЕ НА ПОМОЩНИТЕ ФАЙЛОВЕ В ОНЛАЙН СЪСТЕЗАНИЕТО ”VIVA МАТЕМАТИКА С КОМПЮТЪР	Kenderov, P.; Chehlarova, T.	2020	TRUE	TRUE	TRUE	FALSE	FALSE	FALSE	TRUE	FALSE	FALSE	FALSE	FALSE	FALSE	FALSE	FALSE	TRUE		- competition - integrated math & digital comp. development - using half-baked solutions (files) - learning by doing - euristic strategies - inquiry-based learning Dig.Comp: - 1.1. Browsing, searching and filtering - 2.1. Interacting - 3.1. Developing digital content - 5.3. Creatively using digital technologies
9	http://www.math.bas.bg/smb/2019_PK/tom_2019/pdf/133-142.pdf	ПО СТЪПКИТЕ НА ДИНОЗАВРИТЕ С ИЗСЛЕДОВАТЕЛСКИЯ ПОДХОД В ОБРАЗОВАНИЕТО	Antonova, A.; Miteva, D.; Stefanova, E.; Nikolova, N.	2019	TRUE	TRUE	FALSE	FALSE	FALSE	TRUE	FALSE	FALSE	FALSE	FALSE	FALSE	FALSE	FALSE	FALSE	TRUE		Methods: IBL Еxperiential learning (teachers) Results: Dig. Comp: Digital Content Creation Information and Data Literacy
10	http://www.math.bas.bg/smb/2019_PK/tom_2019/pdf/115-124.pdf	GAMIFICATION OF BLENDED LEARNING WITH	Iliev, T.	2019	FALSE	FALSE	FALSE	TRUE		FALSE	FALSE	FALSE	FALSE	FALSE	FALSE	FALSE	FALSE	FALSE	TRUE		Methods: Active learning Gamification problem-based learning inquiry-based learning, learning by discovery collaborative learning situated learning Dig. comp: 3.4 Programming
11	https://library.iated.org/view/TRENCHEV2022TRA	TRAINING AT SULSIT- THE CONNECTION BETWEEN SECONDARY AND HIGHER EDUCATION	I. Trenchev, I. Peteva, L. Stoyanova, A. Garkinin	2022	FALSE	FALSE	FALSE	TRUE		FALSE	FALSE	FALSE		TRUE	TRUE	FALSE	FALSE	TRUE	FALSE	HE
12	https://library.iated.org/view/TIHOMIROVA2022TRA	TRANSFORMING THE BULGARIAN CLASSROOM WITH AUGMENTED LEARNING UNDER LOCKDOWN	N. Tihomirova, D. Atanasova	2022	FALSE	TRUE	FALSE	FALSE	FALSE	FALSE	TRUE	TRUE		TRUE	TRUE	FALSE	FALSE	TRUE	FALSE
13	https://library.iated.org/view/IVANOVA2022IDE	IDENTIFYING THE CHALLENGES IN THE FIELD OF COMPUTER SCIENCE IN DISTANCE LEARNING IN SECONDARY EDUCATION	B. Ivanova, K. Shoylekova, R. Rusev	2022	FALSE	TRUE	FALSE	FALSE	FALSE	FALSE	TRUE	TRUE		FALSE	FALSE	FALSE	FALSE	TRUE	FALSE	Not teaching and learning practices
14	https://library.iated.org/view/PETROVA2022DIS	DISTANCE LEARNING DURING THE COVID PANDEMIC - SELF-ASSESSMENT OF LEARNING ABILITIES BY STUDENTS (BULGARIAN SECONDARY SCHOOL SURVEY)	S. Petrova, D. Karagyozova-Dilkova, Z. Raykova, M. Atanasova, K. Katsarova, D. Dimova, K. Vitlarov, A. Mollov, M. Dakova	2022	FALSE	FALSE	FALSE	FALSE	FALSE	FALSE	TRUE	FALSE		FALSE	FALSE	FALSE	FALSE	TRUE	FALSE
15	https://library.iated.org/view/DYULGEROVA2021STE	STEM METHODS - EFFECTIVE STRATEGIES FOR TEACHING IT CLASSES IN HIGH SCHOOL EDUCATION,	K. Dyulgerova, D. Atanasova	2021	FALSE	FALSE	FALSE	TRUE	TRUE	FALSE	TRUE	FALSE	FALSE	FALSE	TRUE	FALSE	FALSE	TRUE	FALSE	Extended abstract	Role play game Data bases literacy Competences: 1. Information & data
16	https://library.iated.org/view/TIHOMIROVA2021APP	APPLICATION OF AUGMENTED REALITY (AR) IN BULGARIAN SCHOOL AND ITS POTENTIAL IMPACT ON THE FUTURE OF BULGARIAN EDUCATION	N. Tihomirova, D. Atanasova	2021	FALSE	FALSE	FALSE	FALSE	FALSE	FALSE	TRUE	TRUE		FALSE	TRUE	FALSE	FALSE	TRUE	FALSE
17	https://library.iated.org/view/SLAVOV2021QUA?re=downloadnotallowed	QUALITY OF ELECTRONIC DISTANCE LEARNING IN BULGARIA IN THE CONDITIONS OF THE PANDEMIC CAUSED BY COVID-19 (RESULTS FROM THE STUDY OF THE OPINION OF FORMER LAST YEAR HIGH SCHOOL STUDENTS)	V. Slavov, K. Yotovska, A. Asenova	2021	FALSE	FALSE	FALSE	FALSE	FALSE	FALSE	TRUE	TRUE		FALSE	FALSE	FALSE	FALSE	TRUE	FALSE
18	https://library.iated.org/view/PELTEKOVA2021VIR	THE VIRTUAL REALITY POTENTIAL IN CLASS	E. Peltekova, E. Stefanova	2021	FALSE	FALSE	FALSE	FALSE	FALSE	FALSE	TRUE	TRUE		FALSE	TRUE	FALSE	FALSE	TRUE	FALSE
19	https://azbuki.bg/wp-content/uploads/2021/02/Petur-Kenderov-Toni-Chehlarova-Georgi-Ganchev.pdf	ONLINE COMPETITION "VIVA MATHEMATICS WITH COMPUTER"	Kenderov, P; Chehlarova, T and Gachev, G	2021	TRUE	FALSE	FALSE	FALSE	FALSE	FALSE	TRUE	FALSE	FALSE	TRUE	TRUE	TRUE	FALSE	FALSE	FALSE
20	https://azbuki.bg/wp-content/uploads/2019/03/azbuki.bg_dmdocuments_Math_Info_1_19_Slavova_Garov.pdf	INCREASING THE DIGITAL COMPETENCES OF STUDENTS	Slavova, L and Garov, K	2019	FALSE	FALSE	TRUE	FALSE	FALSE	FALSE	TRUE	FALSE	FALSE	FALSE	FALSE	TRUE	FALSE	FALSE	FALSE
21	https://azbuki.bg/uncategorized/dobavena-realnost-pri-onlajn-obuchenieto-na-uchiteli-za-pridobivane-na-digitalna-kompetentnost/	AUGMENTED REALITY IN ONLINE TEACHER TRANING FOR DIGITAL COMPETENCE	Goranova, E and Voinohovska, V	2021	FALSE	FALSE	FALSE	FALSE	FALSE	TRUE	FALSE	TRUE	FALSE	FALSE	FALSE	TRUE	FALSE	FALSE	FALSE
22	https://azbuki.bg/uncategorized/obzor-i-razvitie-v-profesionalnite-interesi-na-studentite-diplomanti/	OVERVIEW AND DEVELOPMENT IN THE PROFESSIONAL INTERESTS OF GRADUATE STUDENTS	Pavlova, N	2023	FALSE	FALSE	FALSE	FALSE	FALSE	FALSE	FALSE	TRUE	FALSE	FALSE	FALSE	TRUE	FALSE	FALSE	FALSE
23	https://azbuki.bg/wp-content/uploads/2023/02/Matematika_01_Krasimir-Harizanov.pdf	SEVERAL OPPORTUNITIES FOR IMPLEMENTING THE TRAINING IN "COMPUTER MODELING AND INFORMATION TECHNOLOGIES" IN THE 7TH GRADE	Harizanov, K	2023	FALSE	TRUE	FALSE	FALSE	FALSE	FALSE	TRUE	FALSE	FALSE	TRUE	TRUE	TRUE	FALSE	FALSE	FALSE		- Programming - IDEs Conclusions: - Teachers prefer to use the online IDEs as a teaching tool Dig. Comp: - 3.4. Programming
24	https://azbuki.bg/uncategorized/some-methodological-guidelines-on-the-creation-of-educational-games-on-computer-modeling/	SOME METHODOLOGICAL GUIDELINES ON THE CREATION OF EDUCATIONAL GAMES ON "COMPUTER MODELING"	Harizanov, K	2021	FALSE	TRUE	FALSE	FALSE	FALSE	FALSE	TRUE	FALSE	FALSE	TRUE	TRUE	TRUE	FALSE	FALSE	FALSE	Primary school	Methods: - Game-based learning - interactive education Conclusions: Dig. Comp:
25	https://azbuki.bg/uncategorized/igrovo-bazirano-obuchenie-po-programirane-za-nachinaeshhi-v-rezhim-na-pygame-zero-primerni-zadachi-s-turtle-grafika-na-python/ https://www.ceeol.com/search/viewpdf?id=1256836	GAME-BASED PROGRAMMING TRAINING FOR BEGINNERS IN THE PYGAME ZERO ENVIRONMENT- SAMPLE ASSIGNMENTS WITH PYTHON TURTLE GRAPHICS	Georgieva, R	2023	FALSE	TRUE	FALSE	FALSE	FALSE	FALSE	TRUE	FALSE	FALSE	TRUE	TRUE	TRUE	FALSE	FALSE	FALSE		Methods: - Game-based learning - Game development Conclusions: Dig. Comp: 2.1. Interacting... 3.4. Programming 5.3. Creatively using...
26	https://azbuki.bg/uncategorized/the-source-of-life-in-bishops-basilica-of-philippopolis-in-the-context-of-steam/	"THE SOURCE OF LIFE" IN BISHOP'S BASILICA OF PHILIPPOPOLIS IN THE CONTEXT OF STEAM	Chehlarova, T	2021	TRUE	FALSE	TRUE	FALSE	TRUE	FALSE	TRUE	TRUE	FALSE	TRUE	TRUE	TRUE	FALSE	FALSE	FALSE		Information and Data Literacy Digital Content Creation Problem Solving
27	Printed copy	IMPLEMENTING COMPUTATIONAL THINKING IN IT TRAINING: AN INVARIANT FRAMEWORK FOR IT KNOWLEDGE FEATURES	Gaftandzhieva, S; Doneva, R and Atanasova, M	2021	FALSE	FALSE	TRUE	FALSE	TRUE	FALSE	TRUE	TRUE	FALSE	FALSE	TRUE	TRUE	FALSE	FALSE	FALSE
28	https://mathinfo.azbuki.bg/matematics/matharticles2016-4/sp-matematika-i-informatika-knizhka-5-2019-godina-lxii/ https://www.ceeol.com/search/viewpdf?id=818902	GOOGLE CLASSROOM - AN INNOVATIVE APPROACH TO A MORE EFFICIENT ORGANIZATION OF LEARNING	Mollov, M	2019	FALSE	FALSE	FALSE	TRUE	FALSE	FALSE	FALSE	TRUE	FALSE	FALSE	TRUE	TRUE	FALSE	FALSE	FALSE	Primary school
29	https://mathinfo.azbuki.bg/matematics/sadarzhanie-na-sp-matematika-i-informatika-2020-g/sp-matematika-i-informatika-knizhka-6-2020-godina-lxiii/	G SUITE FOR EDUCATION - THE CHALLENGE THAT HAS BECOME A REALITY IN A BULGARIAN SCHOOL	Mollov, M and Stoitsov, G	2020	FALSE	FALSE	FALSE	TRUE	FALSE	FALSE	FALSE	TRUE	FALSE	FALSE	TRUE	TRUE	FALSE	FALSE	FALSE	Not relevant No learning methods discussed Tools withouth context	Methods - remote e-learning Conclusions: - motivation increse - active communication - both - for students and teachers Dig. Comp.: 2.1. Interacting 2.2. Sharing information and content
30	https://mathinfo.azbuki.bg/matematics/sadarzhanie-na-sp-matematika-i-informatika-2020-g/sp-matematika-i-informatika-knizhka-4-2020-godina-lxiii/	TECHNOLOGIES AND TOOLS FOR CREATING ADAPTIVE E-LEARNING CONTENT	Terzieva, T; Arnaudova, V; (...); Ivanova, V	2020	FALSE	FALSE	FALSE	FALSE	FALSE	TRUE	FALSE	TRUE	FALSE	FALSE	FALSE	TRUE	FALSE	FALSE	FALSE
31	https://www.webofscience.com/wos/woscc/full-record/WOS:000487203500005	COMPUTER PROGRAMMING IN MATHEMATICS EDUCATION	Marinov, M and Laskov, L	2019	TRUE	FALSE	FALSE	TRUE	FALSE	FALSE	FALSE	FALSE	FALSE	TRUE	TRUE	TRUE	FALSE	FALSE	FALSE		Methods: ICT & programming in math education Programming (Wolfram language) Conclusions: extends capabilities of educational process DigComp. Information and Data Literacy Digital Content Creation Problem Solving
32	https://www.webofscience.com/wos/woscc/full-record/WOS:000528357600007	THE CHALLENGE - NATIONAL PROGRAM "TRAINING IN IT CAREER"	Molloy, M and Stoitsov, G	2020	FALSE	FALSE	FALSE	TRUE	FALSE	FALSE	TRUE	FALSE	FALSE	FALSE	FALSE	TRUE	FALSE	FALSE	FALSE	Curriculla Policies
33	https://azbuki.bg/wp-content/uploads/2022/02/Matematika_01_Muharem-Mollov.pdf	DEVELOPING PROBLEM SOLVING COMPETENCY USING FUNCTIONAL PROGRAMMING STYLE	Mollov, M and Petrov, P	2022	FALSE	FALSE	FALSE	TRUE	FALSE	FALSE	FALSE	FALSE	FALSE	FALSE	FALSE	TRUE	FALSE	FALSE	FALSE		Methods: - comparative analysis and analogies between FPS, procedure style and logic programming - Problem solving Results: The suggested approach helps to develop FPS, offers opportunity to compare the advantages and the disadvantages of the different paradigms, and develops the ability to choose the proper tools for solving different problems related to software engineering Dig.Comp: 3.4. Progr…
34	https://www.researchgate.net/publication/360892421_Dynamics_in_the_Development_of_Digital_Competence_of_Bulgarian_Teachers	Dynamics in the Development of Digital Competence of Bulgarian Teachers	Zlatkova, P., Kirilova, I.	2022	FALSE	FALSE	FALSE	FALSE	FALSE	TRUE	FALSE	TRUE	FALSE	FALSE	FALSE	FALSE	TRUE	FALSE	FALSE
35	https://www.scopus.com/inward/record.uri?eid=2-s2.0-85180326388&doi=10.1063%2f5.0178652&partnerID=40&md5=b4e15bd008b0c31d2e0fd7ff99b9e0b8	Digital competences of teachers in Europe in the context of distance learning: Messages from the pandemic	Mizova B., Peytcheva-Forsyth R., Tsokov G.	2023	FALSE	FALSE	FALSE	FALSE	FALSE	TRUE	FALSE	TRUE	FALSE	FALSE	FALSE	FALSE	TRUE	FALSE	FALSE
36	https://www.springerprofessional.de/en/literacy-and-professional-training-a-factor-for-overcoming-the-d/26192688	Literacy and Professional Training - A Factor for Overcoming the Digital Divide: Experts’ Opinion from Bulgaria	Zlatkova P., Borisova M.	2023	FALSE	FALSE	FALSE	TRUE	FALSE	TRUE	TRUE	TRUE	FALSE	FALSE	FALSE	FALSE	TRUE	FALSE	FALSE	Not secondary school
37	https://journals.rta.lv/index.php/ETR/article/view/6543/5491	Industry 4.0 - D evelopment and Consequences for Sustainable Development of Bulgaria	Nikolova, N.	2021	FALSE	FALSE	TRUE	TRUE	TRUE	TRUE	TRUE	TRUE	FALSE	FALSE	FALSE	FALSE	TRUE	FALSE	FALSE	Industry SMEs
38	https://www.ijetae.com/files/Volume12Issue4/IJETAE_0422_03.pdf	Digitalization of Modern Society: The Bulgarian Case	Lendzhova V., Milenkova V., Manov B.	2022	FALSE	FALSE	TRUE	TRUE	TRUE	FALSE	TRUE	TRUE	FALSE	FALSE	FALSE	FALSE	TRUE	FALSE	FALSE	digitalization of societ, survey lange specter of online activities out of formal educational system No teaching and learnign methods discussed
39	https://link.springer.com/chapter/10.1007/978-981-19-6755-9_8	Digital Competences in the Public Sector—Challenges for Universities	Bogdanova M., Parashkevova-Velikova E.	2023	FALSE	FALSE	TRUE	TRUE	TRUE	FALSE	TRUE	TRUE	FALSE	FALSE	FALSE	FALSE	TRUE	FALSE	FALSE	HE
40	https://dl.acm.org/doi/10.1145/3407982.3408004	21st Century Skills of ICT Professionals: the Requirements of Business and Readiness of Higher Education in Bulgaria	Antonova, A., Stefanova, E., Nikolova, N., Mihnev, P., Bontchev. B.	2020	FALSE	FALSE	TRUE	TRUE	TRUE	TRUE	TRUE	TRUE	FALSE	FALSE	FALSE	FALSE	TRUE	FALSE	FALSE	HE
41	https://link.springer.com/chapter/10.1007/978-3-031-04819-7_48	Evaluating the Outcomes of Competence-Based Learning Course: The Field Experience for Training 21st Century Skills in Sofia University	Antonova, A., Stefanova, E., Nikolova, N., Mihnev, P., Stamenkova, R., Zafirova-Malcheva, T.	2022	FALSE	FALSE	FALSE	FALSE	FALSE	TRUE	FALSE	TRUE	FALSE	TRUE	TRUE	TRUE	TRUE	FALSE	FALSE
42	https://link.springer.com/chapter/10.1007/978-3-030-72660-7_20	Designing a Competence-Based Learning Course with Digital Tools in Higher Education	Mihnev, P., Antonova, A., Georgiev, A., Stefanov, K., Stefanova, E., Nikolova, N.	2021	FALSE	FALSE	FALSE	FALSE	FALSE	TRUE	TRUE	TRUE	FALSE	TRUE	TRUE	FALSE	TRUE	FALSE	FALSE
43	https://dl.acm.org/doi/10.1145/3351556.3351591	Inclusive Education Course Design for Informatics Teachers	Zafirova-Malcheva, T., Boytchev, P., Stefanova, E., Mihnev, P., Stefanov, K.	2019	FALSE	FALSE	FALSE	FALSE	FALSE	TRUE	FALSE	TRUE	FALSE	TRUE	TRUE	FALSE	TRUE	FALSE	FALSE
44	https://ieeexplore.ieee.org/document/9000433	E-learning and Flipped classroom in Inclusive Education Course Design for Teachers Training	T. Zafirova-Malcheva, P. Boytchev, E. Stefanova, P. Mihnev, K. Stefanov	2019	FALSE	FALSE	FALSE	FALSE	FALSE	TRUE	FALSE	TRUE	FALSE	TRUE	TRUE	TRUE	TRUE	FALSE	FALSE
45	https://journals.sagepub.com/doi/10.1177/03400352231209491	Towards a STEAM model for digital fluency skills: Perceptions of students and teachers	Encheva, M., Tammaro, A. M., Yancheva, G., Zlatkova, P., Conti, G., & Maasilta, M.	2024	TRUE	FALSE	FALSE	FALSE	FALSE	FALSE	TRUE	TRUE	FALSE	TRUE	TRUE	FALSE	TRUE	FALSE	FALSE	HE
46	https://library.iated.org/view/ILIEVA2021STU	THE STUDENTS' CHALLENGES OF E-LEARNING IN A FAST-MOVING ENVIRONMENT - BULGARIAN HIGH SCHOOL DIGITALIZATION REVIEW	B. Ilieva, G. Atanasova	2021	FALSE	FALSE	FALSE	FALSE	FALSE	FALSE	FALSE	FALSE	TRUE	FALSE	FALSE	FALSE	FALSE	TRUE	FALSE
47	https://library.iated.org/view/ANCHEVA2020STE	STEM METHODOLOGY IN STUDYING ARRAY DATA STRUCTURE IN EXTRACURRICULAR CLASSES	V. Ancheva, V. Voinohovska	2020	FALSE	FALSE	FALSE	FALSE	FALSE	FALSE	FALSE	FALSE	FALSE	FALSE	FALSE	FALSE	FALSE	TRUE	FALSE
48	https://www.webofscience.com/wos/woscc/full-record/WOS:000551093102123	USING GAMIFICATION METHODS IN INFORMATION TECHNOLOGY EDUCATION	Ivanov, S	2019	FALSE	FALSE	TRUE	FALSE	FALSE	FALSE	TRUE	TRUE	FALSE	TRUE	TRUE	TRUE	FALSE	FALSE	FALSE
49	https://www.webofscience.com/wos/woscc/full-record/WOS:000530212403115	A BULGARIAN PLATFORM FOR A BLENDED LEARNING FROM A TEACHER'S VIEW - CHALLENGE OR POSSIBILITY	Tihomirova, N and Atanasova, D	2019	FALSE	FALSE	FALSE	FALSE	FALSE	TRUE	TRUE	TRUE	FALSE	TRUE	TRUE	TRUE	FALSE	FALSE	FALSE
				Total	10	8	12	15	7	16	28	29	4	18	21	22	13	10	7
				Not relevant	1	1	4	8	4	3	10	7	0	3	3
				Extended abstract only	1	0	1	1	1	0	2	0	0	0	0
				Included	9	7	8	7	3	13	18	22	4	15	18	22	13	10	7

## Sheet: Selection process
		Excluded
MIJ	Total	Not relevant	Doublicated	Final
dig comp	5	2	1	2
computer modeling	6	2		4
ICT in Edu	2	1	1	0
IT Edu	12	6	1	5
Programming	12	9		3
	37	20	3	14
WoS
digital competences + Bulgarian school	13	8	0	5
digital competences in ICT education + Bulgarian education	2	0	1	1
digital competences + computer modeling	2	1	1	0
ICT in education + Mathematics	23	23	0	0
ICT in education + digital literacy	9	9	0	0
digital competences + teaching information technology	15	15	0	0
digital competences + Mathematics	12	12	0	0
digital skills + Mathematics	15	15	0
	91	83	2	6

## Sheet: Summary
		Excluded
	Total after filters and keyword search	Doublicated	Not eligible	For further elaboration
WoS	91	2	83	6
Scopus	21	1	8	12
МИ	37	3	20	14
СМБ	50	0	43	7
IATED	26	3	13	10
	225	9	167	49
			216
Databases	138
Registers	87

## Sheet: CMIT
Method	References (authors, year)	Digital competences affected	Results			#	Results
Game-based learning	1. Georgieva, Tuparova (2019) 25. Georgieva (2023)	2.1. Interacting through digital competences 3.4. Programming 5.3. Creatively using digital technologies	1 2 3 4			1	Motivation
Learning by programming	1. Georgieva, Tuparova (2019) 23. Harizanov (2023)	2.1. Interacting through digital competences 3.4. Programming	1 2 3 4			2	Fun / Entertainment
Game development through programming	1. Georgieva, Tuparova (2019) 25. Georgieva (2023)	2.1. Interacting through digital competences 3.4. Programming 5.3. Creatively using digital technologies	1 2 3 4			3	Educational goals achievement
Competitions	8. Kenderov, Chehlarova (2020)	1.1. Browsing, searching and filtering data, information and digital content 2.1. Interacting through digital technologies 3.1. Developing digital content 3.2. Integrating and re-elaborating digital content 5.3. Creatively using digital technologies	3 5			4	Immediate feedback
STEM interdisciplinary learning	8. Kenderov, Chehlarova (2020) 9. Antonova et all (2019)	1.1. Browsing, searching and filtering data, information and digital content 2.1. Interacting through digital technologies 3.1. Developing digital content 3.2. Integrating and re-elaborating digital content 5.3. Creatively using digital technologies	1 3 5 6			5	learning habits development
Inquiry-based learning	8. Kenderov, Chehlarova (2020) 9. Antonova et all (2019)	1.1. Browsing, searching and filtering data, information and digital content 2.1. Interacting through digital technologies 3.1. Developing digital content 3.2. Integrating and re-elaborating digital content 5.3. Creatively using digital technologies	1 3 5 6			6	Learning to learn
Learnig by doing	8. Kenderov, Chehlarova (2020) 9. Antonova et all (2019)	1.1. Browsing, searching and filtering data, information and digital content 2.1. Interacting through digital technologies 3.1. Developing digital content 3.2. Integrating and re-elaborating digital content 5.3. Creatively using digital technologies	1 3 5 6
Euristic strategies	8. Kenderov, Chehlarova (2020) 9. Antonova et all (2019)	1.1. Browsing, searching and filtering data, information and digital content 2.1. Interacting through digital technologies 3.1. Developing digital content 3.2. Integrating and re-elaborating digital content 5.3. Creatively using digital technologies	1 3 5 6			7

## Sheet: InfSP
Method	References (authors, year)	Digital competences affected	Results			#	Result
Gamification and Game-based learning	1. Georgieva, Tuparova (2019) 10. Trayan Iliev (2019)	2.1. Interacting through digital technologies 3.4. Programming 5.3. Creatively using digital technologies	1 2 3 4			1	Motivation
Role-play game	15. K. Dyulgerova, D. Atanasova (2021)*	1.3. Managing data, information and digital content	1 6			2	Fun / Entertainment
Learning by programming	1. Georgieva, Tuparova (2019) 2. Vladimir Zablotskii, Svetlana Vasileva (2020) 31. Marinov, M and Laskov, L (2019)* 33. Mollov, M and Petrov, P (2022)	1. Information and data literacy 2.1. Interacting through digital technologies 3.4. Programming 5.2. Identifying needs and technological resources 5.3. Creatively using digital technologies	1 2 3 4 5 7			3	Educational goals achievement
Game development through programming	1. Georgieva, Tuparova (2019)	2.1. Interacting through digital technologies 3.4. Programming 5.3. Creatively using digital technologies	1 2 3 4			4	Immediate feedback
Problem-based learning	2. Vladimir Zablotskii, Svetlana Vasileva (2020) 31. Marinov, M and Laskov, L (2019)* 33. Mollov, M and Petrov, P (2022)	1. Information and data literacy 2.1. Interacting through digital technologies 3.4. Programming 5.2. Identifying needs and technological resources 5.3. Creatively using digital technologies	5 7			5	Self-regulated learning habits development
Inquiry-based learning	10. Trayan Iliev (2019)	3.4. Programming	3 4			6	Deep understanding of the learning content
Heuristic strategies: - Comparative analisys & analogies	33. Mollov, M and Petrov, P (2022)	3.4. Programming	3 6 7			7	Extension of the capabilities of the learnign process
